# Supplementary material for: Are Americans Feeling Less Healthy? The Puzzle of Trends in Self-rated Health
Source: PubMed Central journal article supplement — Am J Epidemiol. 2009 Jun 29;170(3):343–51. doi: 10.1093/aje/kwp144 (PMC2714952; doi:10.1093/aje/kwp144), 2009-06-29
Supplement: kwp144_1.pdf [file kwp144_1.pdf]

Web Figure 1. Comparison of self-reports and proxy reports of “fair” or “poor” health in the Current Population Survey, by sex, age, race/ethnicity and education, 1996-2007. Open diamond, proxy report; filled diamond, self-report; solid line, proxy reports and self-reports combined.

Web Figure 2. Weighted sample composition by race and education in four nationally representative United States surveys, 1998-2007. Open circle, Behavioral Risk Factor Surveillance System; filled diamond, Current Population Survey; filled square, National Health and Nutrition Examination Survey; open triangle, National Health Interview Survey.

Web Figure 3. Age-adjusted trends in mean self-rated health scores in (A) males and (B) females in four nationally representative United States surveys, 1971-2007. Individual scores calculated by coding “excellent” responses as 5, “very good” as 4, etc. Open circle, Behavioral Risk Factor Surveillance System; filled diamond, Current Population Survey; filled square, National Health and Nutrition Examination Survey; open triangle, National Health Interview Survey.
