# Supplementary material for: Are Americans Feeling Less Healthy? The Puzzle of Trends in Self-rated Health
Source: PubMed Central journal article supplement — Am J Epidemiol. 2009 Jun 29;170(3):343–51. doi: 10.1093/aje/kwp144 (PMC2714952; doi:10.1093/aje/kwp144), 2009-06-29
Supplement: kwp144_2.pdf [file kwp144_2.pdf]

All

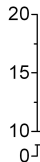

Males

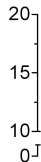

Females

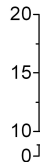

20-49 Years

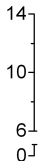

50-64 Years

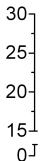

65 Years and Older

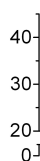

White, Non-Hispanic

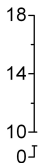

Black, Non-Hispanic

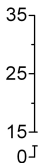

Hispanic

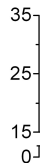

Less Than High School

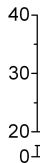

High school

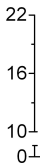

More Than High School

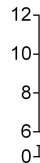

Percent Fair or Poor

Year
