# Supplementary figures and images for: Are Americans Feeling Less Healthy? The Puzzle of Trends in Self-rated Health
Source: PubMed Central journal article supplement — Am J Epidemiol. 2009 Jun 29;170(3):343–51. doi: 10.1093/aje/kwp144 (PMC2714952; doi:10.1093/aje/kwp144), 2009-06-29

A)

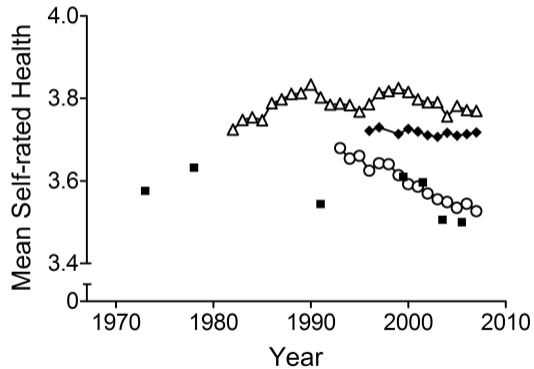

B)

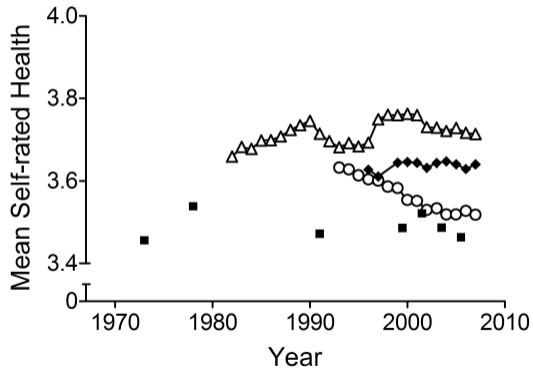

Supplement: kwp144_4.pdf [file kwp144_4.pdf]
